# Supplementary material for: Secreted heme peroxidase from Dictyostelium discoideum: Insights into catalysis, structure, and biological role
Source: PubMed Central journal article supplement (PMC5787809; doi:10.1074/jbc.ra117.000463), 2017-12-14
Supplement: supp_RA117.000463_133183_1_supp_31172_p0y0t5.pdf [file supp_RA117.000463_133183_1_supp_31172_p0y0t5.pdf]

## SUPPLEMENTAL INFORMATION

### **Secreted Heme Peroxidase from *Dictyostelium discoideum*: Insights into Catalysis, Structure and Biological Role**

**Andrea Nicolussi<sup>[1]</sup>, Joe Dan Dunn<sup>[2]</sup>, Georg Mlynek<sup>[3]</sup>, Marzia Bellei<sup>[4]</sup>, Marcel Zamocky<sup>[1,5]</sup>, Gianantonio Battistuzzi<sup>[6]</sup>, Kristina Djinović-Carugo<sup>[3,7]</sup>, Paul G. Furtmüller<sup>[1]</sup>, Thierry Soldati<sup>[2]</sup>, and Christian Obinger<sup>[1]\*</sup>**

[1] Department of Chemistry, Division of Biochemistry, BOKU - University of Natural Resources and Life Sciences, 1190 Vienna, Austria; [2] Department of Biochemistry, Faculty of Science, University of Geneva, 1211 Genève, Switzerland; [3] Department for Structural and Computational Biology, Max F. Perutz Laboratories, University of Vienna, 1030 Vienna, Austria; [4] Department of Life Sciences, University of Modena and Reggio Emilia, via Campi 103, 41125 Modena, Italy; [5] Institute of Molecular Biology, Slovak Academy of Sciences, 84551 Bratislava, Slovakia; [6] Department of Chemistry and Geology, University of Modena and Reggio Emilia, 41125 Modena, Italy; [7] Department of Biochemistry, Faculty of Chemistry and Chemical Technology, University of Ljubljana, 1000 Ljubljana, Slovenia

**Running title:** Secreted heme peroxidase from *Dictyostelium discoideum*

\*Author to whom correspondence should be addressed: Christian Obinger. Phone: +43-1-47654-77273; fax: +43-1-47654-77059, email: christian.obinger@boku.ac.at

|           |                                                                                             |                     |                               |                 |                     |                           |
|-----------|---------------------------------------------------------------------------------------------|---------------------|-------------------------------|-----------------|---------------------|---------------------------|
| DdPoxA    | -----                                                                                       |                     | 0                             |                 |                     |                           |
| goat LPO  | -----MLVCLHLQVFLASVALFEV--AASDTIAQAASTTISDAVSKVKTQVNKAFLDSRRLKALSS                          |                     | 62                            |                 |                     |                           |
| human EPO | -----MHLLPALAGVLATLVLAQPCGTDPA SPGAVETSVLRDCIAEAKLLVDAAYNWTQKSIKQRLRS                       |                     | 64                            |                 |                     |                           |
| human MPO | MGVPPFFSRLRCMVDLGPWCAGGLTAEMLKLLALAGLAILATPQPSEGAAPVLGEVDTSLVLSMEEAKQLVDKAYKERRRESIKQRLRS   |                     | 90                            |                 |                     |                           |
|           |                                                                                             |                     |                               |                 |                     |                           |
| DdPoxA    | -----MRLNLLISFF--IIFITLVISINSQEFRSYITGE                                                     |                     | 30                            |                 |                     |                           |
| goat LPO  | EAPTTRQLSEYFKHAKGRTRTAIRNGQVWEESLKRLLRD-----T-TLTNVTDPSELELTALSWEVGGGAPVPLVTCDEQSPYRTITGD   |                     | 144                           |                 |                     |                           |
| human EPO | GSASPMDLLSYFKQVAAATRTVVRAADYMHVALGLLEEKLPQRSRPFNVTDVL-TEPQLRLLSQASGCALRDAQERCS--DKYRTITGR   |                     | 151                           |                 |                     |                           |
| human MPO | GSASPMELLSYFKQVAAATRTAVRAADYLHVALDLLERKLSLWRRPFNVTDVL-TPAQLNVLSKSSGCAYQDVGVTCPEQDKYRTITGM   |                     | 179                           |                 |                     |                           |
|           |                                                                                             | * * *               | : * : **                      |                 |                     |                           |
|           |                                                                                             |                     |                               |                 |                     |                           |
|           | S1                                                                                          | H1                  | H2                            |                 |                     |                           |
| DdPoxA    | GNKKQNPKQGSITPFIRLAN-----PI----KFNKNGFPNITNQPSRAISNIIFDQQT-HIGSKEHLTDMFNMMWQFLIHNMAALS      |                     | 106                           |                 |                     |                           |
| goat LPO  | CNNRRSPALGAANRALARWLPAEYEDGLAVPFGWTQKTRNGFRVLP---LAREVSNKIVGYLDEEGVLQDNRSLLFMQWQIIVHDLDFD   |                     | 231                           |                 |                     |                           |
| human EPO | CNNKRRPLLGASNQALARWLPAEYEDGLSFPFGWTPSRRRNGFLLP---LVRAVSNQIVRFPPNERLTSDRGRALMFMQWQFIDHDLDFS  |                     | 238                           |                 |                     |                           |
| human MPO | CNNRRSPPLGASNRAFRWLPAEYEDGFSLPYGTWPGVKNRPFVFA---LARAVSNEIVRFPTDQLTPDQERSLMMFMQWQLLDHDLDFD   |                     | 266                           |                 |                     |                           |
|           | ** : * * :                                                                                  | * * * :             | * * * : * : * :               |                 |                     |                           |
|           |                                                                                             |                     |                               |                 |                     |                           |
| DdPoxA    | KPE-----PNSWPIKVPKCDQYFDPACIGNKTMNYFRTRADEVPCDVGKTVDVEDGKCYEQINSLGSYIDGNVLYG                |                     | 177                           |                 |                     |                           |
| goat LPO  | PETELGSSEHSKQVCEEYCVQDECFPIPFKNDPKLKT---QGKMPFFRAGFV---CPTP---PYQSLARDQINAVTSLFDASLVYG      |                     | 311                           |                 |                     |                           |
| human EPO | PESPARVAFTAGVDCERTCAQLPPCFPIKIPNDPRIKN---QRDCIPFFRSAPS---CPQN---K---NRVRNQINALTSEVFDASMYG   |                     | 316                           |                 |                     |                           |
| human MPO | PEPAARASFVTVGNVCEVQVPPCFPLKIPNDPRIKN---QADCIFFRSAPCA---CPGS---N---ITIRNQINALTSEVFDASMYG     |                     | 344                           |                 |                     |                           |
|           | : * : * * :                                                                                 | : * : * * :         | : * : * * : * : * : * *       |                 |                     |                           |
|           |                                                                                             |                     |                               |                 |                     |                           |
|           | H4                                                                                          | H5                  | H6                            |                 |                     |                           |
| DdPoxA    | NSEETCKNLRSLSGGEMKMTVDV---G--DLPPKNVPGVPMNDANLFPIDQLYSVGERRGNENPGLLSIHTLLLRDHNRLARKFARL     |                     | 261                           |                 |                     |                           |
| goat LPO  | SEPSLASRLRNLSPLGLMAVNGEAWDHGLAYPPFNKVPSPCEF---INTTAHVPCFQAGDSRASQIILLATVHTLLREHNRLARELKR    |                     | 400                           |                 |                     |                           |
| human EPO | SEVLSLRLLRNRTNYLGLLAINQRFDQNGRALLPFDNLHDDPCLL---TNRSARIPCFLAGDTRSTTPKLAAMHTLFMRHNRLATELRRL  |                     | 405                           |                 |                     |                           |
| human MPO | SEEPRLARNLRNMSNLGLLAVNQRFQDNGRALLPFDNLHDDPCLL---TNRSARIPCFLAGDTRSSMPELTSMHTLLREHNRLATELKS   |                     | 433                           |                 |                     |                           |
|           | . . . * . . :                                                                               | : * : * * :         | * : * : * : * : * : * : *     |                 |                     |                           |
|           |                                                                                             |                     |                               |                 |                     |                           |
| DdPoxA    | HPWEDDERVFQQRSCIIEQIQKITIDEYLPTTLGS-----FPSYTGVDANVNAQVSNNEFTTAFRFGSEVGPFMEEYSENGTRLQP-     |                     | 344                           |                 |                     |                           |
| goat LPO  | NPHWDGEMLYQEARKILGAFIQIITFRDYLPVLGS-EMQKWIPPYQGYNNSVDPRIANVFT-FAFRFGMEVPSTVSRLDENYQPWGPE    |                     | 488                           |                 |                     |                           |
| human EPO | NPRWNGDKLYNEARKIMGAMVQIITYRDYLPVLGKARARTLGHYRGYCSNVDPRIANVFT-LAFRFGTMLQPFMFRDLSQYRASAPN     |                     | 494                           |                 |                     |                           |
| human MPO | NPRWDGERLYQEARKIVGAMVQIITYRDYLPVLGPTAMRKYLPYRSYNSVDPRIANVFT-NAFRYGTLLIQPFMFRDNRYPQMEPN      |                     | 522                           |                 |                     |                           |
|           | * : * * . . : * : * . :                                                                     | : * * : * * : * * : | : * * : * * : * * : * * : * * |                 |                     |                           |
|           |                                                                                             |                     |                               |                 |                     |                           |
|           | H9                                                                                          | H10                 | H11                           | H12             | H13                 | H14                       |
| DdPoxA    | --LPIKFSYFNP--HALNRGVEPLIRGLIINEEE--NIDIYMI\$DLRNFLFGKPGQ-GGLDLASRLQCRDRHGIPPYNSLRRQLGLRPV  |                     |                               |                 |                     | 427                       |
| goat LPO  | AELPLHTLFFNTWRIKIDGGIDPLVRGLLAKNSKLMNQNMVTELRNKLFPQTHKVVHGFDLAAIQLQCRDHGMPGYNSWRGFCGLSQP    |                     |                               |                 |                     | 578                       |
| human EPO | SHVPLSSAFFASWRIVYEGGIDPILRGLMATPAKLNQDAMLVDELDRDLFRQVRR-IGLDLAALMQSRDHGLPGYNAWRRFCGLSQP     |                     |                               |                 |                     | 583                       |
| human MPO | PRVPLSRVFFASWRVVLGEGIDPILRGLMATPAKLNQNIQIIVAEIRERLFEQVMR-IGLDLPAALMQSRDHGLPGYNAWRRFCGLSQP   |                     |                               |                 |                     | 611                       |
|           | : * :                                                                                       | : * : * : * * :     | : * : * : * * :               | : * : * : * * : | : * : * : * * :     | : * * * * * * : * * :     |
|           |                                                                                             |                     |                               |                 |                     |                           |
|           | H15                                                                                         | H16                 | H17                           | H18             | H19                 | H20                       |
| DdPoxA    | QTWS--DITSDPQIQNRLKNAYKSVDDIDSYVGGLEAEDHMEGSCVQTFYLIIEYQFFRTRAGDRFWYETPEMRMNVNREC--ETTTFAE  |                     |                               |                 |                     | 512                       |
| goat LPO  | KTLKGLQAVLNKVKLAKLLDLKTPDNIDIWIGGNAEPMVERGVGPELLACLGRQFQQIRDGDRFVWENPGVTEKQRDSLQKVFSFR      |                     |                               |                 |                     | 668                       |
| human EPO | RNLQLSRVLKNQDLARKFLNLYGTPDNIIDIWIGAIAPLLPGARVGPGLLACLFENQFRARDDGDRFVWQKRGVFTKRQRKALSRI SLSR |                     |                               |                 |                     | 673                       |
| human MPO | ETVQGLTVLRNKLARKLMEQYGTPNNDIWMGGVSEPLKRKRGVGPELLACIIGTQFRKLRDGDGRFVWENEGVFSMQQRQALAI SLPR   |                     |                               |                 |                     | 701                       |
|           | . . :                                                                                       | : * : * * : * * :   | : * * : * * :                 | : * * : * * :   | : * * : * * : * * : | : * * : * * : * * : * * : |
|           |                                                                                             |                     |                               |                 |                     |                           |
|           | H21                                                                                         |                     |                               |                 |                     |                           |
| DdPoxA    | VIKRTSNIIGYVQPNVFRK*-----                                                                   |                     |                               |                 |                     | 531                       |
| goat LPO  | LICDNTHITKVP-L-HAFQANNYPHDFVDCSAVDKLDLSPWASREN*                                             |                     |                               |                 |                     | 712                       |
| human EPO | IICDNTGITTVSR-DIFRANIYPRGFVNC\$RI PRLNLSAWRGT*--                                            |                     |                               |                 |                     | 715                       |
| human MPO | IICDNTGITTVSKNNIFMSNSYPRDFVNC\$TLPALNLSAWREAS*--                                            |                     |                               |                 |                     | 745                       |
|           | : * . *                                                                                     | . *                 | . *                           | . *             | . *                 | . *                       |

**Supplemental Figure S1. Structural alignment of DdPoxA in comparison to mammalian peroxidases.** Total sequence alignment of DdPoxA with goat LPO, human EPO and human MPO. Secondary structure elements of DdPoxA are highlighted in grey ( $\alpha$ -helices) and orange ( $\beta$ -strands). The native signal sequence of DdPoxA is depicted in blue. Important distal residues are shown in yellow, the conserved glutamate forming the heme to protein bond is highlighted in green. The distal isoleucine of DdPoxA is depicted in pink. The conserved proximal triad is shown in red. Fully conserved residues are marked with an asterisk, a colon indicates residues with strongly similar properties, and a period shows residues with weakly similar properties.

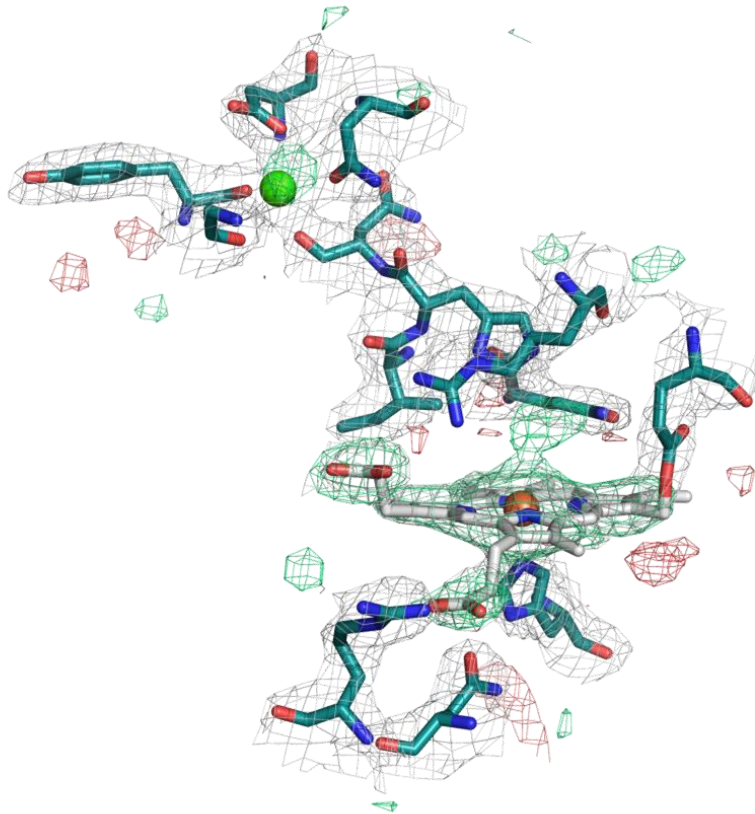

**Supplemental Figure S2. OMIT map of DdPoxA active site structure.** OMIT map (A) of the active site structure of DdPoxA. The 2.5 Å resolution  $mF_o-DF_c$  maps contoured at  $\pm 3 \sigma$  positive (green) and negative (red) and  $2mF_o-DF_c$  maximum-likelihood omit map contoured at  $1 \sigma$  (grey) are shown. Maps were calculated for a refined model with the heme atoms omitted.

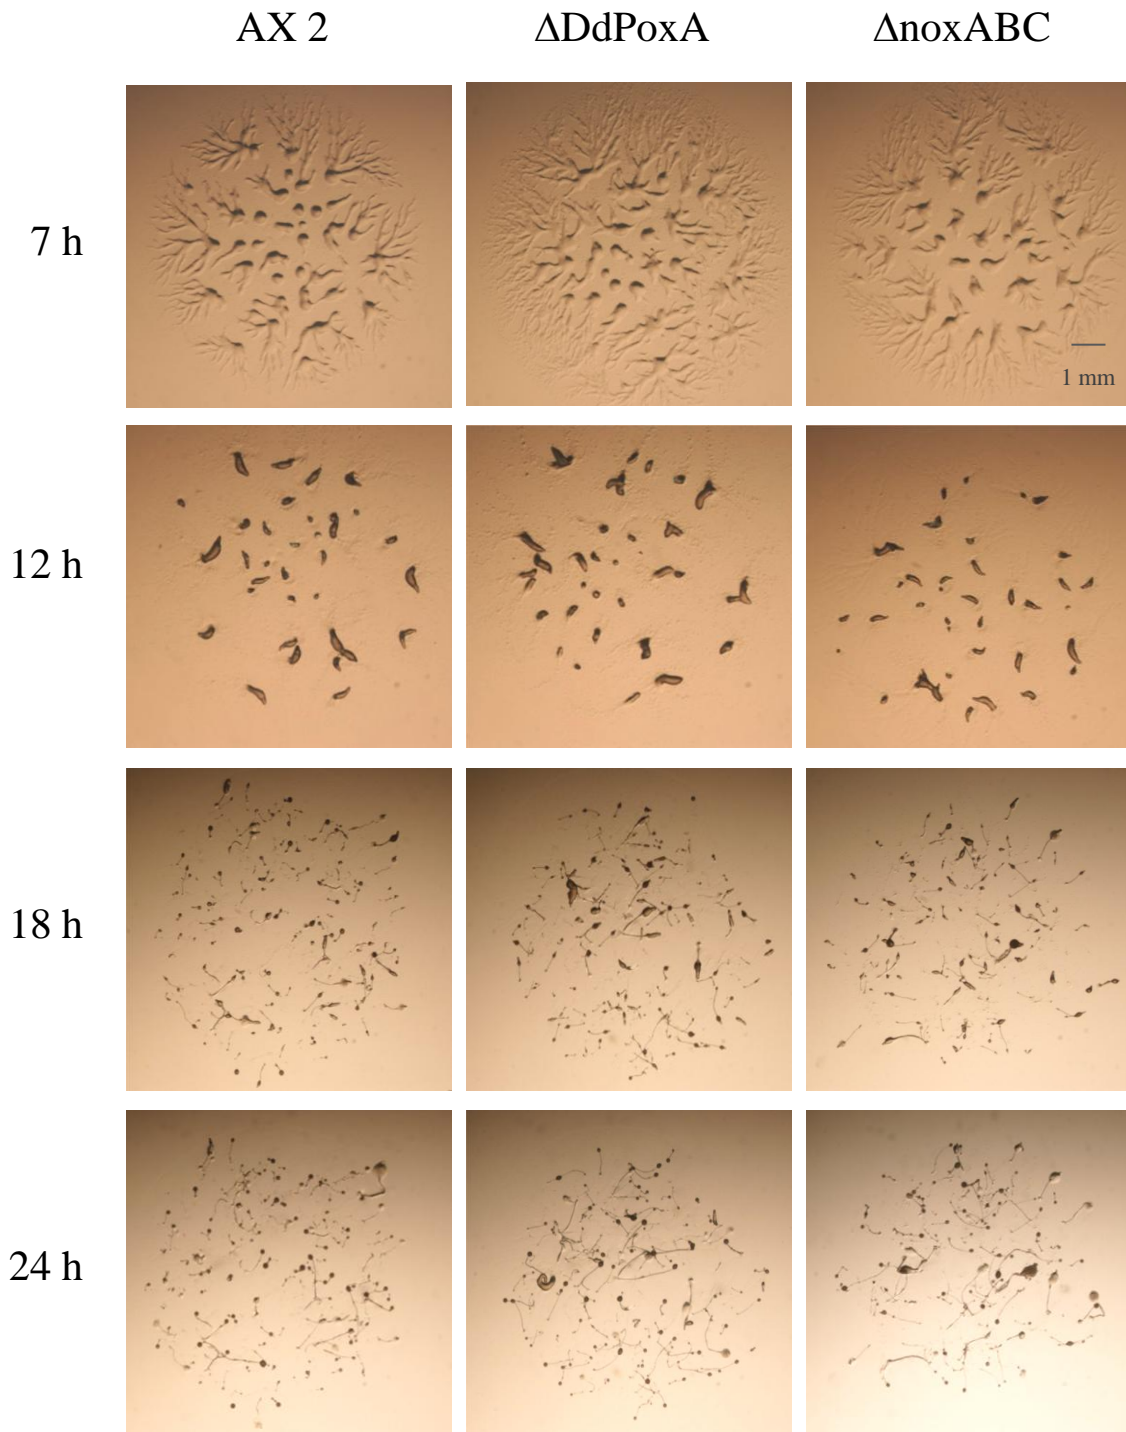

**Supplemental Figure S3. Comparative cell development.** Representative images of *D. discoideum* wild-type (AX2),  $\Delta$ DdPoxA and  $\Delta$ noxABC mutants throughout the development cycle (7, 12, 18 and 24 h after start of starvation) recorded using a stereomicroscope. Cell density in all images is  $1 \times 10^6$  cells per drop.
